# Supplementary material
Source: MDPI journal article supplement (https://www.mdpi.com/2073-4395/12/4/840)
Supplement: s1 [file s1]

**Supplementary material: A two-year field experiment for the management of bread and durum wheat fungal diseases and of deoxynivalenol accumulation in grain in Central Italy**

**Balducci E.<sup>1</sup>, Tini F. <sup>1</sup>, Beccari G.<sup>1</sup>, Ricci G.<sup>1</sup>, Ceron-Bustamante M.<sup>1</sup>, Orfei M.<sup>1</sup>, Guiducci M.<sup>1</sup>, Covarelli L.<sup>1</sup>**

<sup>1</sup>*Department of Agricultural, Food and Environmental Sciences, University of Perugia, Borgo XX Giugno, 74, 06121 Perugia, Italy*

**Supplementary Table S1.** Detailed information on agronomic practices and fungicide treatments carried out in the field trials in 2018/2019 and 2019/2020.

| <b>2018/2019</b>                                     |                                                                                            |             |
|------------------------------------------------------|--------------------------------------------------------------------------------------------|-------------|
| <b>Agronomic practices</b>                           | <b>Description</b>                                                                         | <b>Date</b> |
| Background fertilisation                             | 75 U/ha P <sub>2</sub> O <sub>5</sub>                                                      | 07/08/2018  |
| Tillage                                              |                                                                                            | 08/08/2018  |
| Harrowing                                            |                                                                                            | 12/10/2018  |
| Seed treatment                                       | Kinto (prochloraz 60 g/L, triticonazole 20 g/L)                                            | -           |
| Sowing                                               | Durum wheat 450 seeds/m <sup>2</sup> , bread wheat 480 seeds/m <sup>2</sup>                | 16/11/2018  |
| Nitrogen fertilisation (1 <sup>st</sup> application) | 100 U/ha N                                                                                 | 11/01/2019  |
| Nitrogen fertilisation (2 <sup>nd</sup> application) | 80 U/ha N                                                                                  | 18/03/2019  |
| Chemical weeding                                     | Manta Gold 3L/ha (fluroxypyr 60 g/L, clopyralid 23.3 g/L, 266 g/L MCPA pure from ester)    | 30/03/2019  |
| Insecticide treatment                                | DecisEVO 0,5 l/ha (deltametrin 25 g/L)                                                     | 15/05/2019  |
| <b>Fungicide treatments</b>                          | <b>Varieties</b>                                                                           | <b>Date</b> |
| BBCH 39 application                                  | All varieties                                                                              | 30/04/2019  |
|                                                      | Egeo and Nogal                                                                             | 10/05/2019  |
| BBCH 65 application                                  | Lancillotto, Kanakis, Marakas, Metropolis, Monastir                                        | 15/05/2019  |
|                                                      | Antalis, Don Matteo, Farah, Oregrain, Solehio, Rebelde, Altavista, Ramirez                 | 17/05/2019  |
| <b>2019/2020</b>                                     |                                                                                            |             |
| <b>Agronomic practices</b>                           | <b>Description</b>                                                                         | <b>Date</b> |
| Background fertilisation                             | 75 U/ha P <sub>2</sub> O <sub>5</sub>                                                      | 01/10/2019  |
| Tillage                                              |                                                                                            | 13/08/2019  |
| Harrowing                                            |                                                                                            | 26/11/2019  |
| Seed treatment                                       | Kinto (prochloraz 60 g/L, triticonazole 20 g/L)                                            | -           |
| Sowing                                               | Durum wheat 460 seeds/m <sup>2</sup> , bread wheat 500 seeds/m <sup>2</sup>                | 27/11/2019  |
| Nitrogen fertilization (1 <sup>st</sup> application) | 80 U/ha N                                                                                  | 30/01/2020  |
| Nitrogen fertilization (2 <sup>nd</sup> application) | 90 U/ha N                                                                                  | 24/03/2020  |
| Chemical weeding                                     | Ariane II 4L/ha (fluroxypyr 57,6/L clopyralid 26.4 g/L, MCPA potassium pure salt 238 g/L); | 11/03/2020  |
| Insecticide treatment                                | DecisEVO 0,5 l/ha (deltametrin 25 g/L)                                                     | 27/04/2020  |
| <b>Fungicide treatments</b>                          | <b>Varieties</b>                                                                           | <b>Date</b> |
| BBCH 39 application                                  | All varieties                                                                              | 24/04/2020  |
|                                                      | Nogal                                                                                      | 04/05/2020  |
|                                                      | Egeo, Kanakis, Ramirez                                                                     | 05/05/2020  |
| BBCH 65 application                                  | Lancillotto, Oregrain, Marakas, Metropolis, Monastir                                       | 06/05/2020  |
|                                                      | Altavista, Rebelde, Solehio                                                                | 14/05/2020  |
|                                                      | Antalis, Farah, Don Matteo                                                                 | 19/05/2020  |

**Supplementary Table S2.** Effect of fungicide treatments on *Septoria tritici* blotch symptoms, during the two experimental years.

| during the two experimental years.          |                  |                    |   |                      |        |    |                      |        |   |                      |        |    |
|---------------------------------------------|------------------|--------------------|---|----------------------|--------|----|----------------------|--------|---|----------------------|--------|----|
| Septoria tritici blotch index (%) 2018/2019 |                  |                    |   |                      |        |    |                      |        |   |                      |        |    |
| Varieties                                   | utc <sup>1</sup> |                    |   | Fung. A <sup>1</sup> |        |    | Fung. B <sup>1</sup> |        |   | Fung. C <sup>1</sup> |        |    |
|                                             | % <sup>2</sup>   | St_er <sup>3</sup> |   | %                    | St_er  |    | %                    | St_er  |   | %                    | St_er  |    |
| Oregrain                                    | 0.00             | ± 0.00             |   | 0.00                 | ± 0.00 |    | 0.00                 | ± 0.00 |   | 0.00                 | ± 0.00 |    |
| Lancillotto                                 | 0.33             | ± 0.33             |   | 0.00                 | ± 0.00 |    | 0.00                 | ± 0.00 |   | 0.00                 | ± 0.00 |    |
| Marakas                                     | 2.33             | ± 1.33             |   | 0.00                 | ± 0.00 |    | 0.00                 | ± 0.00 |   | 0.00                 | ± 0.00 |    |
| Egeo                                        | 10.00            | ± 2.89             | a | 0.33                 | ± 0.33 | ab | 0.00                 | ± 0.00 | b | 3.67                 | ± 3.18 | ab |
| Ramirez                                     | 5.00             | ± 0.00             | a | 0.00                 | ± 0.00 | b  | 0.00                 | ± 0.00 | b | 0.00                 | ± 0.00 | b  |
| Kanakis                                     | 5.00             | ± 2.89             |   | 0.33                 | ± 0.33 |    | 0.33                 | ± 0.33 |   | 0.00                 | ± 0.00 |    |
| Altavista                                   | 0.00             | ± 0.00             |   | 0.00                 | ± 0.00 |    | 0.00                 | ± 0.00 |   | 0.00                 | ± 0.00 |    |
| Nogal                                       | 0.33             | ± 0.33             |   | 0.00                 | ± 0.00 |    | 0.00                 | ± 0.00 |   | 0.00                 | ± 0.00 |    |
| Monastir                                    | 1.00             | ± 0.00             | a | 0.00                 | ± 0.00 | b  | 0.00                 | ± 0.00 | b | 0.00                 | ± 0.00 | b  |
| Farah                                       | 3.67             | ± 1.33             | a | 0.00                 | ± 0.00 | b  | 0.00                 | ± 0.00 | b | 0.00                 | ± 0.00 | b  |
| Don Matteo                                  | 8.33             | ± 1.67             | a | 0.00                 | ± 0.00 | b  | 0.00                 | ± 0.00 | b | 0.00                 | ± 0.00 | b  |
| Antalis                                     | 8.33             | ± 1.67             | a | 0.00                 | ± 0.00 | b  | 0.00                 | ± 0.00 | b | 0.00                 | ± 0.00 | b  |
| Metropolis                                  | 1.00             | ± 0.00             | a | 0.00                 | ± 0.00 | b  | 0.67                 | ± 0.33 | b | 0.00                 | ± 0.00 | b  |
| Solehio                                     | 0.00             | ± 0.00             |   | 0.00                 | ± 0.00 |    | 0.00                 | ± 0.00 |   | 0.00                 | ± 0.00 |    |
| Rebelde                                     | 2.33             | ± 1.33             |   | 0.00                 | ± 0.00 |    | 0.00                 | ± 0.00 |   | 0.00                 | ± 0.00 |    |
| Total <sup>4</sup>                          | 3.18             | ± 0.58             | a | 0.09                 | ± 0.04 | b  | 0.02                 | ± 0.02 | b | 0.24                 | ± 0.22 | b  |
| DW <sup>4</sup>                             | 5.46             | ± 0.81             | a | 0.17                 | ± 0.08 | b  | 0.04                 | ± 0.04 | b | 0.46                 | ± 0.42 | b  |
| BW <sup>4</sup>                             | 0.57             | ± 0.24             | a | 0.00                 | ± 0.00 | b  | 0.00                 | ± 0.00 | b | 0.00                 | ± 0.00 | b  |

| Septoria tritici blotch index (%) 2019/2020 |      |        |   |         |        |   |         |        |   |         |        |   |
|---------------------------------------------|------|--------|---|---------|--------|---|---------|--------|---|---------|--------|---|
| Varieties                                   | utc  |        |   | Fung. A |        |   | Fung. B |        |   | Fung. C |        |   |
|                                             | %    | St_er  |   | %       | St_er  |   | %       | St_er  |   | %       | St_er  |   |
| Oregrain                                    | 0.67 | ± 0.33 |   | 0.00    | ± 0.00 |   | 0.00    | ± 0.00 |   | 0.00    | ± 0.00 |   |
| Lancillotto                                 | 1.33 | ± 0.33 | a | 0.00    | ± 0.00 | b | 0.00    | ± 0.00 | b | 0.00    | ± 0.00 | b |
| Marakas                                     | 1.00 | ± 0.00 | a | 0.00    | ± 0.00 | b | 0.00    | ± 0.00 | b | 0.00    | ± 0.00 | b |
| Egeo                                        | 1.33 | ± 0.33 | a | 0.00    | ± 0.00 | b | 0.00    | ± 0.00 | b | 0.00    | ± 0.00 | b |
| Ramirez                                     | 1.33 | ± 0.33 | a | 0.00    | ± 0.00 | b | 0.00    | ± 0.00 | b | 0.00    | ± 0.00 | b |
| Kanakis                                     | 1.00 | ± 0.58 |   | 0.00    | ± 0.00 |   | 0.00    | ± 0.00 |   | 0.00    | ± 0.00 |   |
| Altavista                                   | 0.67 | ± 0.33 |   | 0.00    | ± 0.00 |   | 0.00    | ± 0.00 |   | 0.00    | ± 0.00 |   |
| Nogal                                       | 0.33 | ± 0.33 |   | 0.00    | ± 0.00 |   | 0.00    | ± 0.00 |   | 0.00    | ± 0.00 |   |
| Monastir                                    | 1.00 | ± 0.00 | a | 0.00    | ± 0.00 | b | 0.00    | ± 0.00 | b | 0.00    | ± 0.00 | b |
| Farah                                       | 0.67 | ± 0.33 |   | 0.00    | ± 0.00 |   | 0.00    | ± 0.00 |   | 0.00    | ± 0.00 |   |
| Don Matteo                                  | 1.33 | ± 0.33 | a | 0.00    | ± 0.00 | b | 0.00    | ± 0.00 | b | 0.00    | ± 0.00 | b |
| Antalis                                     | 1.67 | ± 0.33 | a | 0.00    | ± 0.00 | b | 0.00    | ± 0.00 | b | 0.00    | ± 0.00 | b |
| Metropolis                                  | 1.00 | ± 0.00 | a | 0.00    | ± 0.00 | b | 0.00    | ± 0.00 | b | 0.00    | ± 0.00 | b |
| Solehio                                     | 0.67 | ± 0.33 |   | 0.00    | ± 0.00 |   | 0.00    | ± 0.00 |   | 0.00    | ± 0.00 |   |
| Rebelde                                     | 1.33 | ± 0.33 | a | 0.00    | ± 0.00 | b | 0.00    | ± 0.00 | b | 0.00    | ± 0.00 | b |
| Total                                       | 1.02 | ± 0.09 | a | 0.00    | ± 0.00 | b | 0.00    | ± 0.00 | b | 0.00    | ± 0.00 | b |
| DW                                          | 1.16 | ± 0.13 | a | 0.00    | ± 0.00 | b | 0.00    | ± 0.00 | b | 0.00    | ± 0.13 | b |
| BW                                          | 0.86 | ± 0.13 | a | 0.00    | ± 0.00 | b | 0.00    | ± 0.00 | b | 0.00    | ± 0.00 | b |

<sup>1</sup>untreated control (utc); fungicide combination A (Fung. A); fungicide combination B (Fung. B); fungicide combination C (Fung. C). <sup>2</sup>Average value. <sup>3</sup>Standard Error. <sup>4</sup>Average of all wheat varieties (Total) or durum (DW) and bread (BW) wheat varieties as two separate groups. Averages with different letters are significantly different at P ≤ 0.05 based on the Tukey's HSD adjustment for multiple comparison tests. The absence of letters means the absence of significant differences.

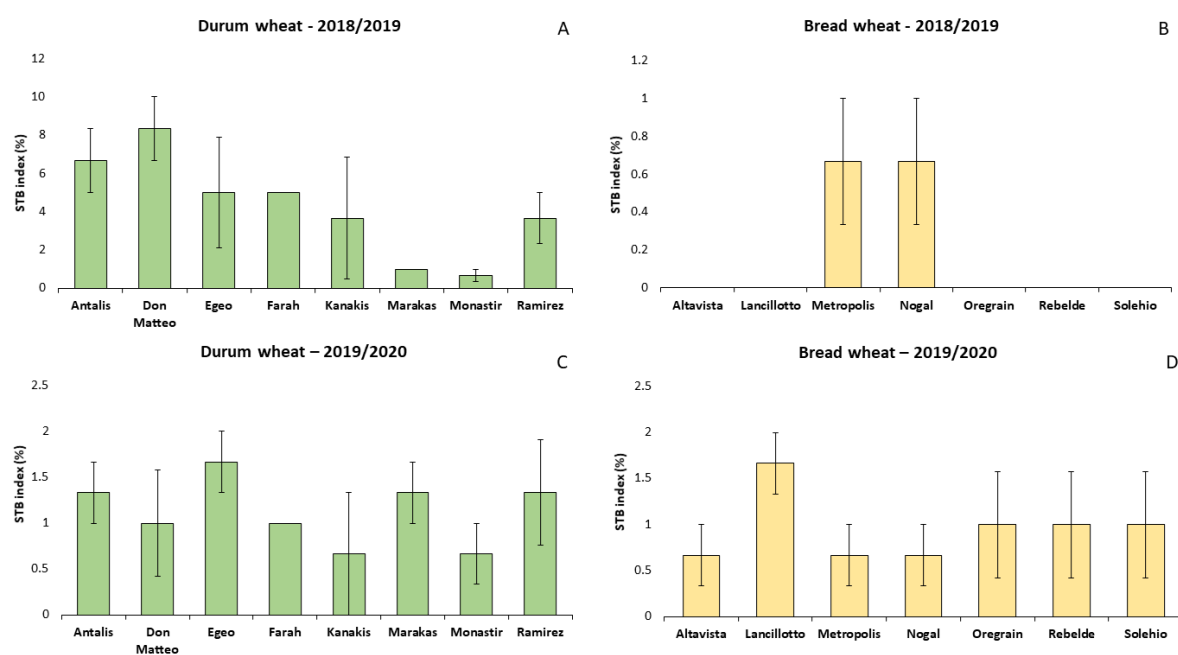

**Supplementary Figure S1.** Average level of *Septoria tritici* blotch (STB) index (%) indicating STB symptoms observed in the field only for durum and bread wheat untreated controls in 2018/2019 (A, B) and 2019/2020 (B, C). Columns represent average data ( $\pm$  standard error) for each variety. No significant differences among varieties were recorded.

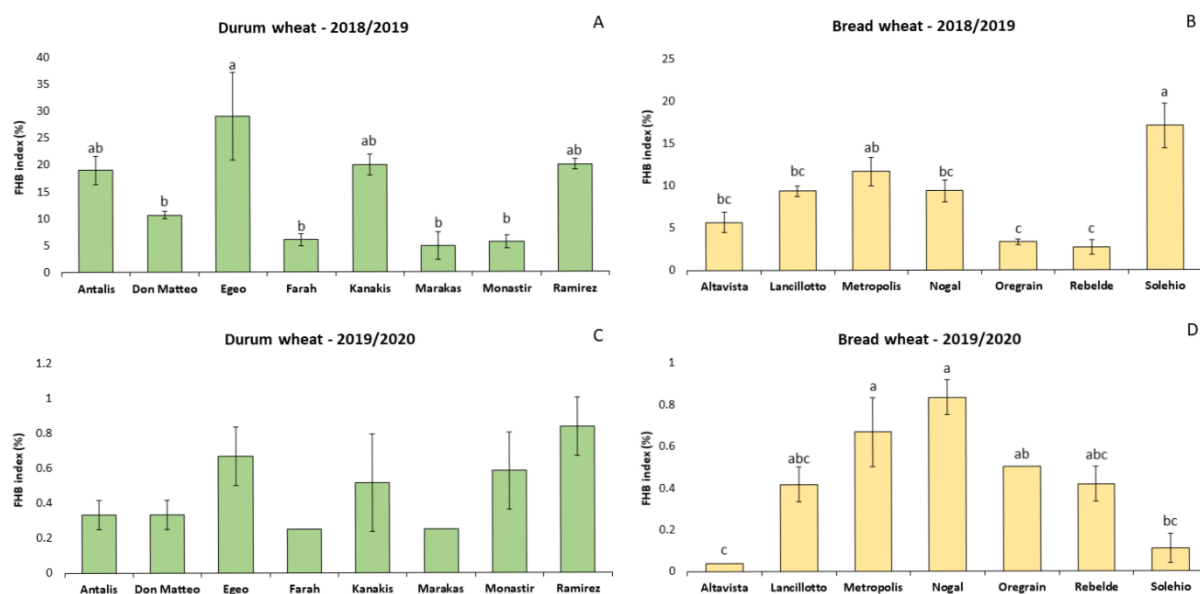

**Supplementary Figure S2.** Average level of *Fusarium* head blight (FHB) index (%) indicating FHB symptoms observed in the field only for durum wheat and bread wheat untreated-inoculated controls in 2018/2019 (A, B) and 2019/2020 (B, C). Columns represent average data ( $\pm$  standard error) for each variety. Averages with different letters are significantly different at  $P \leq 0.05$  based on the Tukey's HSD adjustment for multiple comparison tests. The absence of letters means the absence of significant differences.

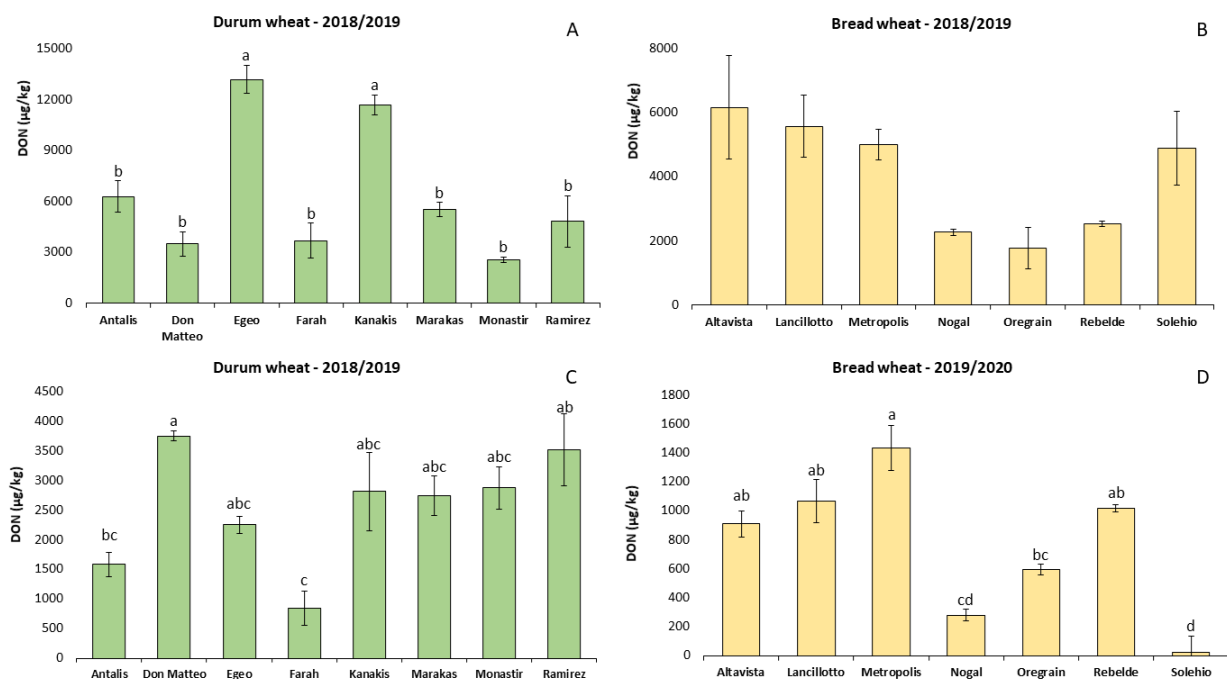

**Supplementary Figure S3.** Average level of deoxynivalenol (DON, µg/kg) grain contamination of durum and bread wheat untreated-inoculated controls in 2018/2019 (A, B) and 2019/2020 (B, C). Columns represent average data ( $\pm$  standard error) for each variety. Averages with different letters are significantly different at  $P \leq 0.05$  based on the Tukey's HSD adjustment for multiple comparison tests. The absence of letters means the absence of significant differences.

**Supplementary Table S3.** Effect of fungicide treatments on the yield (t/ha) of bread and durum wheat varieties in the two experimental years.

| Yield (t/ha) - 2018/2019 |                   |    |                 |    |                       |    |      |                      |       |    |                      |    |       |                      |      |    |
|--------------------------|-------------------|----|-----------------|----|-----------------------|----|------|----------------------|-------|----|----------------------|----|-------|----------------------|------|----|
| Varieties                | utc <sup>1</sup>  |    |                 |    | utc+inoc <sup>1</sup> |    |      | Fung. A <sup>1</sup> |       |    | Fung. B <sup>1</sup> |    |       | Fung. C <sup>1</sup> |      |    |
|                          | t/ha <sup>2</sup> | St | er <sup>3</sup> |    | t/ha                  | St | er   | t/ha                 | St    | er | t/ha                 | St | er    | t/ha                 | St   | er |
| Oregrain                 | 9.28              | ±  | 0.21            | b  | 7.93                  | ±  | 0.37 | c                    | 10.07 | ±  | 0.07                 | ab | 10.30 | ±                    | 0.23 | a  |
| Lancillotto              | 9.01              | ±  | 0.05            | a  | 7.48                  | ±  | 0.17 | b                    | 9.47  | ±  | 0.27                 | a  | 9.15  | ±                    | 0.29 | a  |
| Marakas                  | 7.74              | ±  | 0.18            | bc | 7.19                  | ±  | 0.13 | c                    | 8.70  | ±  | 0.11                 | ab | 8.26  | ±                    | 0.26 | ab |
| Egeo                     | 7.28              | ±  | 0.03            | a  | 4.81                  | ±  | 0.47 | b                    | 7.69  | ±  | 0.34                 | a  | 7.96  | ±                    | 0.18 | a  |
| Ramirez                  | 6.99              | ±  | 0.18            | a  | 4.56                  | ±  | 0.38 | a                    | 7.84  | ±  | 0.07                 | ab | 6.64  | ±                    | 1.06 | ab |
| Kanakis                  | 6.93              | ±  | 0.47            | ab | 5.12                  | ±  | 0.32 | b                    | 7.41  | ±  | 0.22                 | a  | 6.74  | ±                    | 0.35 | ab |
| Altavista                | 7.28              | ±  | 0.29            |    | 6.22                  | ±  | 0.55 |                      | 8.01  | ±  | 0.71                 |    | 8.55  | ±                    | 0.29 |    |
| Nogal                    | 7.84              | ±  | 0.64            | ab | 7.35                  | ±  | 0.32 | b                    | 8.38  | ±  | 0.25                 | ab | 8.72  | ±                    | 0.38 | ab |
| Monastir                 | 8.08              | ±  | 0.21            |    | 7.59                  | ±  | 0.08 |                      | 9.01  | ±  | 0.22                 |    | 8.57  | ±                    | 0.16 |    |
| Farah                    | 7.05              | ±  | 0.11            |    | 6.57                  | ±  | 0.35 |                      | 8.02  | ±  | 0.54                 |    | 7.53  | ±                    | 0.11 |    |
| Don Matteo               | 6.66              | ±  | 0.42            | ab | 6.05                  | ±  | 0.01 | b                    | 7.62  | ±  | 0.22                 | a  | 7.53  | ±                    | 0.17 | a  |
| Antalis                  | 8.24              | ±  | 0.69            | a  | 5.51                  | ±  | 0.14 | b                    | 7.74  | ±  | 0.15                 | a  | 8.28  | ±                    | 0.19 | a  |
| Metropolis               | 8.46              | ±  | 0.12            | b  | 7.08                  | ±  | 0.15 | c                    | 9.20  | ±  | 0.18                 | ab | 8.70  | ±                    | 0.26 | ab |
| Solehio                  | 7.63              | ±  | 0.72            |    | 6.73                  | ±  | 0.52 |                      | 8.93  | ±  | 0.59                 |    | 9.39  | ±                    | 0.38 |    |
| Rebelde                  | 7.41              | ±  | 0.32            |    | 6.31                  | ±  | 0.36 |                      | 7.80  | ±  | 0.35                 |    | 7.42  | ±                    | 0.68 |    |
| Total <sup>4</sup>       | 7.73              | ±  | 0.14            | b  | 6.44                  | ±  | 0.17 | c                    | 8.39  | ±  | 0.14                 | a  | 8.25  | ±                    | 0.17 | ab |
| DW <sup>4</sup>          | 7.37              | ±  | 0.15            | a  | 5.93                  | ±  | 0.23 | b                    | 8.00  | ±  | 0.14                 | a  | 7.69  | ±                    | 0.19 | a  |
| BW <sup>4</sup>          | 8.13              | ±  | 0.21            | b  | 7.02                  | ±  | 0.18 | c                    | 8.84  | ±  | 0.21                 | a  | 8.89  | ±                    | 0.22 | ab |

| Yield (t/ha) - 2019/2020 |      |        |          |        |         |        |         |        |         |        |   |
|--------------------------|------|--------|----------|--------|---------|--------|---------|--------|---------|--------|---|
| Varieties                | utc  |        | utc+inoc |        | Fung. A |        | Fung. B |        | Fung. C |        |   |
|                          | t/ha | St_er  | t/ha     | St_er  | t/ha    | St_er  | t/ha    | St_er  | t/ha    | St_er  |   |
| Oregrain                 | 6.85 | ± 0.17 | 6.67     | ± 0.21 | 6.74    | ± 0.35 | 6.84    | ± 0.18 | 6.87    | ± 0.16 |   |
| Lancillotto              | 6.55 | ± 0.31 | 6.52     | ± 0.24 | 6.79    | ± 0.08 | 6.63    | ± 0.09 | 6.77    | ± 0.45 |   |
| Marakas                  | 5.86 | ± 0.13 | 5.87     | ± 0.13 | 6.10    | ± 0.31 | 5.84    | ± 0.16 | 6.19    | ± 0.08 |   |
| Egeo                     | 5.12 | ± 0.09 | 4.95     | ± 0.28 | 5.17    | ± 0.15 | 5.35    | ± 0.16 | 5.68    | ± 0.56 |   |
| Ramirez                  | 6.34 | ± 0.12 | 6.18     | ± 0.25 | 6.20    | ± 0.20 | 6.27    | ± 0.21 | 6.29    | ± 0.08 |   |
| Kanakis                  | 5.24 | ± 0.29 | 5.11     | ± 0.16 | 5.21    | ± 0.31 | 4.89    | ± 0.42 | 5.18    | ± 0.70 |   |
| Altavista                | 4.97 | ± 0.25 | 4.94     | ± 0.23 | 5.10    | ± 0.20 | 5.40    | ± 0.44 | 5.11    | ± 0.25 |   |
| Nogal                    | 5.78 | ± 0.38 | 5.57     | ± 0.18 | 5.71    | ± 0.10 | 5.67    | ± 0.16 | 5.96    | ± 0.21 |   |
| Monastir                 | 6.04 | ± 0.29 | 5.86     | ± 0.34 | 6.33    | ± 0.26 | 6.09    | ± 0.05 | 5.98    | ± 0.23 |   |
| Farah                    | 6.39 | ± 0.10 | 6.39     | ± 0.16 | 6.65    | ± 0.13 | 6.42    | ± 0.19 | 6.38    | ± 0.18 |   |
| Don Matteo               | 6.48 | ± 0.24 | 6.58     | ± 0.25 | 6.69    | ± 0.34 | 6.77    | ± 0.20 | 6.82    | ± 0.05 |   |
| Antalis                  | 5.98 | ± 0.15 | 6.12     | ± 0.24 | 6.13    | ± 0.22 | 6.41    | ± 0.24 | 6.28    | ± 0.16 |   |
| Metropolis               | 6.31 | ± 0.29 | 6.39     | ± 0.22 | 6.40    | ± 0.36 | 6.54    | ± 0.10 | 6.59    | ± 0.10 |   |
| Solehio                  | 6.51 | ± 0.16 | 6.13     | ± 0.04 | 6.88    | ± 0.10 | 6.76    | ± 0.02 | 6.70    | ± 0.34 |   |
| Rebelde                  | 5.80 | ± 0.18 | 5.66     | ± 0.10 | 5.87    | ± 0.09 | 5.72    | ± 0.22 | 5.61    | ± 0.16 |   |
| Total                    | 6.01 | ± 0.09 | 5.93     | ± 0.10 | 6.13    | ± 0.10 | 6.11    | ± 0.10 | 6.16    | ± 0.11 | b |
| DW                       | 5.93 | ± 0.11 | 5.88     | ± 0.13 | 6.06    | ± 0.14 | 6.00    | ± 0.14 | 6.10    | ± 0.14 |   |
| BW                       | 6.11 | ± 0.16 | 5.98     | ± 0.14 | 6.21    | ± 0.16 | 6.22    | ± 0.14 | 6.23    | ± 0.16 |   |

<sup>1</sup>untreated control (utc); untreated-inoculated control (utc+inoc); fungicide combination A (Fung. A); fungicide combination B (Fung. B); fungicide combination C (Fung. C). <sup>2</sup>Average value. <sup>3</sup>Standard Error. <sup>4</sup>Average of all wheat varieties (Total) or durum (DW) and bread (BW) wheat varieties as two separate groups. Averages with different letters are significantly different at P ≤ 0.05 based on the Tukey's HSD adjustment for multiple comparison tests. The absence of letters means the absence of significant differences.

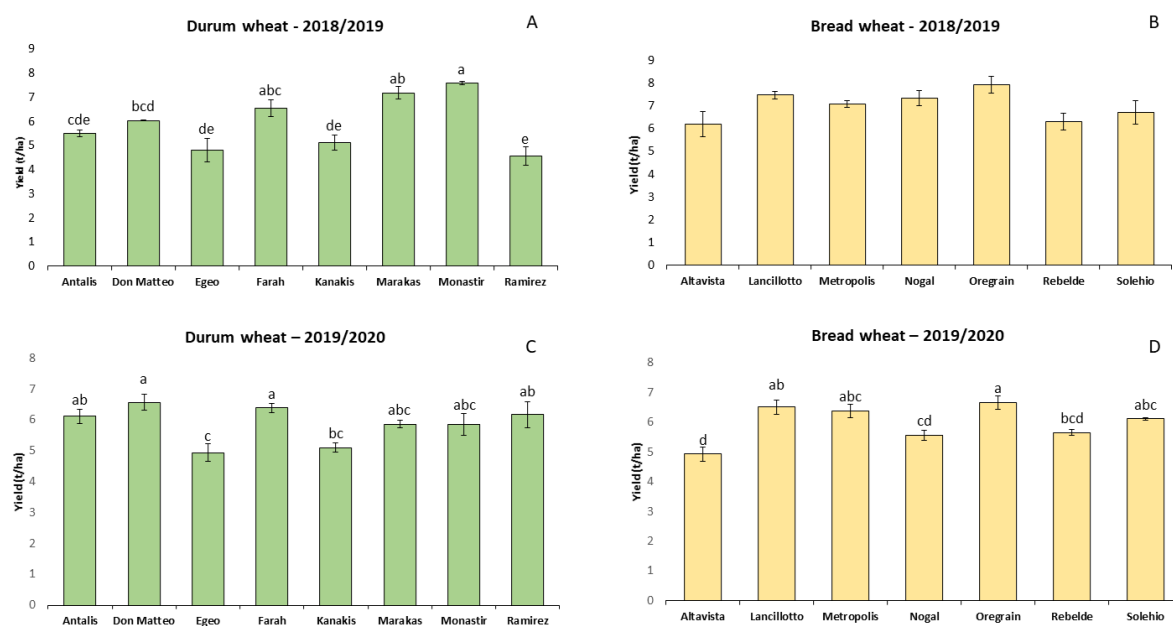

**Supplementary Figure S4.** Average yield (t/ha) of durum wheat and bread wheat untreated-inoculated controls in 2018/2019 (A, B) and 2019/2020 (B, C). Columns represent average data ( $\pm$  standard error) for each variety. Averages with different letters are significantly different at  $P \leq 0.05$  based on the Tukey's HSD adjustment for multiple comparison tests. The absence of letters means the absence of significant differences.

**Supplementary Table S4.** Effect of fungicide treatments on the test weight (kg/hL) of bread and durum wheat varieties in the two experimental years.

| Test weight (kg/hL) – 2018/2019 |                    |                    |   |                       |        |                      |       |                      |       |                      |        |    |
|---------------------------------|--------------------|--------------------|---|-----------------------|--------|----------------------|-------|----------------------|-------|----------------------|--------|----|
| Varieties                       | utc <sup>1</sup>   |                    |   | utc+inoc <sup>1</sup> |        | Fung. A <sup>1</sup> |       | Fung. B <sup>1</sup> |       | Fung. C <sup>1</sup> |        |    |
|                                 | kg/hL <sup>2</sup> | St_er <sup>3</sup> |   | kg/hL                 | St_er  | kg/hL                | St_er | kg/hL                | St_er | kg/hL                | St_er  |    |
| Oregrain                        | 78.00              | ± 0.29             | b | 74.77                 | ± 0.78 | a                    | 78.67 | ± 0.27               | b     | 78.73                | ± 0.32 | b  |
| Lancillotto                     | 81.37              | ± 0.03             | b | 77.43                 | ± 0.48 | a                    | 81.10 | ± 0.56               | b     | 81.43                | ± 0.22 | b  |
| Marakas                         | 82.77              | ± 0.30             | b | 79.40                 | ± 0.07 | a                    | 83.60 | ± 0.21               | b     | 82.73                | ± 0.82 | b  |
| Egeo                            | 83.60              | ± 0.26             | b | 77.43                 | ± 0.83 | a                    | 84.40 | ± 0.44               | b     | 84.27                | ± 0.15 | b  |
| Ramirez                         | 81.77              | ± 0.43             | b | 75.37                 | ± 1.27 | a                    | 84.70 | ± 0.15               | b     | 81.40                | ± 2.96 | b  |
| Kanakis                         | 83.60              | ± 0.23             | b | 76.90                 | ± 1.18 | a                    | 83.20 | ± 0.64               | b     | 83.47                | ± 0.74 | b  |
| Altavista                       | 82.60              | ± 0.40             | b | 77.47                 | ± 1.50 | a                    | 83.70 | ± 0.10               | b     | 83.63                | ± 0.09 | b  |
| Nogal                           | 79.87              | ± 0.15             | b | 77.50                 | ± 0.55 | a                    | 80.53 | ± 0.27               | b     | 80.60                | ± 0.10 | b  |
| Monastir                        | 79.90              | ± 0.21             |   | 77.90                 | ± 0.51 |                      | 80.83 | ± 0.37               |       | 80.73                | ± 0.09 |    |
| Farah                           | 85.17              | ± 0.13             | b | 82.97                 | ± 0.28 | a                    | 85.20 | ± 0.49               | b     | 85.70                | ± 0.15 | b  |
| D.Matteo                        | 83.47              | ± 0.71             | b | 80.85                 | ± 0.49 | a                    | 85.23 | ± 0.17               | b     | 85.10                | ± 0.30 | b  |
| Antalis                         | 83.87              | ± 0.52             | b | 78.40                 | ± 0.61 | a                    | 84.47 | ± 0.44               | b     | 85.27                | ± 0.24 | b  |
| Metropolis                      | 83.10              | ± 0.06             | b | 78.27                 | ± 0.62 | a                    | 83.63 | ± 0.15               | b     | 83.23                | ± 0.23 | b  |
| Solehio                         | 78.47              | ± 0.09             | b | 74.33                 | ± 1.13 | a                    | 79.20 | ± 0.21               | b     | 79.97                | ± 0.27 | b  |
| Rebelde                         | 82.90              | ± 0.21             | b | 78.97                 | ± 1.44 | a                    | 83.27 | ± 0.28               | b     | 83.40                | ± 0.29 | b  |
| Total <sup>4</sup>              | 82.03              | ± 0.31             | a | 77.86                 | ± 0.38 | b                    | 82.78 | ± 0.32               | a     | 82.64                | ± 0.35 | ab |
| DW <sup>4</sup>                 | 83.02              | ± 0.33             | a | 78.65                 | ± 0.52 | b                    | 83.95 | ± 0.31               | a     | 83.58                | ± 0.48 | a  |
| BW <sup>4</sup>                 | 80.90              | ± 0.45             | a | 76.96                 | ± 0.48 | b                    | 81.44 | ± 0.45               | a     | 81.57                | ± 0.40 | a  |

| Test weight (kg/hL) – 2019/2020 |       |        |          |       |         |       |         |        |         |       |        |   |
|---------------------------------|-------|--------|----------|-------|---------|-------|---------|--------|---------|-------|--------|---|
| Varieties                       | utc   |        | utc+inoc |       | Fung. A |       | Fung. B |        | Fung. C |       |        |   |
|                                 | kg/hL | St_er  | kg/hL    | St_er | kg/hL   | St_er | kg/hL   | St_er  | kg/hL   | St_er |        |   |
| Oregrain                        | 80.97 | ± 0.23 |          | 79.57 | ± 0.68  |       | 81.23   | ± 0.15 |         | 81.20 | ± 0.25 |   |
| Lancillotto                     | 80.47 | ± 0.09 | b        | 80.33 | ± 0.19  | b     | 80.70   | ± 0.12 | ab      | 81.40 | ± 0.15 | a |
| Marakas                         | 82.30 | ± 0.71 |          | 81.87 | ± 0.70  |       | 82.57   | ± 0.18 |         | 82.20 | ± 0.49 |   |
| Egeo                            | 80.77 | ± 1.63 |          | 79.77 | ± 1.93  |       | 80.47   | ± 1.99 |         | 82.57 | ± 0.84 |   |
| Ramirez                         | 85.40 | ± 1.85 |          | 82.40 | ± 0.35  |       | 83.87   | ± 0.15 |         | 84.43 | ± 0.12 |   |
| Kanakis                         | 80.97 | ± 0.23 |          | 79.57 | ± 0.68  |       | 81.23   | ± 0.15 |         | 81.20 | ± 0.25 |   |
| Altavista                       | 83.13 | ± 0.23 | ab       | 82.77 | ± 0.09  | b     | 83.27   | ± 0.13 | ab      | 83.77 | ± 0.03 | a |
| Nogal                           | 79.93 | ± 0.28 |          | 79.87 | ± 0.33  |       | 80.57   | ± 0.24 |         | 79.57 | ± 1.29 |   |
| Monastir                        | 81.40 | ± 0.25 |          | 80.97 | ± 0.29  |       | 81.60   | ± 0.15 |         | 81.93 | ± 0.20 |   |
| Farah                           | 83.87 | ± 0.07 |          | 83.77 | ± 0.12  |       | 84.37   | ± 0.07 |         | 84.20 | ± 0.15 |   |
| D.Matteo                        | 83.17 | ± 0.29 |          | 82.90 | ± 0.10  |       | 83.53   | ± 0.12 |         | 83.50 | ± 0.10 |   |
| Antalis                         | 83.17 | ± 0.29 |          | 82.90 | ± 0.10  |       | 83.53   | ± 0.12 |         | 83.50 | ± 0.10 |   |
| Metropolis                      | 83.07 | ± 0.68 |          | 81.77 | ± 0.93  |       | 83.40   | ± 0.55 |         | 82.77 | ± 0.88 |   |
| Solehio                         | 80.43 | ± 0.32 |          | 80.07 | ± 0.13  |       | 80.50   | ± 0.20 |         | 79.93 | ± 0.23 |   |
| Rebelde                         | 82.53 | ± 0.45 |          | 82.90 | ± 0.26  |       | 83.30   | ± 0.12 |         | 82.87 | ± 0.94 |   |
| Total                           | 82.10 | ± 0.27 |          | 81.43 | ± 0.26  |       | 82.28   | ± 0.24 |         | 82.34 | ± 0.25 |   |
| DW                              | 82.63 | ± 0.41 |          | 81.77 | ± 0.37  |       | 82.65   | ± 0.35 |         | 82.94 | ± 0.25 |   |
| BW                              | 81.50 | ± 0.31 |          | 81.04 | ± 0.33  |       | 81.85   | ± 0.30 |         | 81.64 | ± 0.39 |   |

<sup>1</sup>untreated control (utc); untreated-inoculated control (utc+inoc); fungicide combination A (Fung. A); fungicide combination B (Fung. B); fungicide combination C (Fung. C). <sup>2</sup>Average value. <sup>3</sup>Standard Error. <sup>4</sup>Average of all wheat varieties (Total) or durum (DW) and bread (BW) wheat varieties as two separate groups. Averages with different letters are significantly different at P ≤ 0.05 based on the Tukey's HSD adjustment for multiple comparison tests. The absence of letters means the absence of significant differences.



**Supplementary Table S5.** Effect of fungicide treatments on the protein content (%) of bread and durum wheat varieties in the two experimental years.

| Protein (%) - 2018/2019 |                  |                    |    |  |                       |        |   |  |                      |        |                      |  |                      |        |    |
|-------------------------|------------------|--------------------|----|--|-----------------------|--------|---|--|----------------------|--------|----------------------|--|----------------------|--------|----|
| Varieties               | utc <sup>1</sup> |                    |    |  | utc+inoc <sup>1</sup> |        |   |  | Fung. A <sup>1</sup> |        | Fung. B <sup>1</sup> |  | Fung. C <sup>1</sup> |        |    |
|                         | % <sup>2</sup>   | St_er <sup>3</sup> |    |  | %                     | St_er  |   |  | %                    | St_er  |                      |  | %                    | St_er  |    |
| Oregrain                | 11.97            | ± 0.12             | ab |  | 12.30                 | ± 0.10 | a |  | 11.83                | ± 0.12 | b                    |  | 11.90                | ± 0.15 | b  |
| Lancillotto             | 13.33            | ± 0.07             | ab |  | 13.43                 | ± 0.12 | a |  | 13.10                | ± 0.10 | ab                   |  | 13.30                | ± 0.06 | ab |
| Marakas                 | 13.90            | ± 0.15             | a  |  | 14.00                 | ± 0.17 | a |  | 13.33                | ± 0.15 | ab                   |  | 13.57                | ± 0.21 | ab |
| Egeo                    | 13.60            | ± 0.06             | b  |  | 15.00                 | ± 0.21 | a |  | 13.63                | ± 0.12 | b                    |  | 13.57                | ± 0.15 | b  |
| Ramirez                 | 13.47            | ± 0.24             | ab |  | 15.30                 | ± 0.21 | a |  | 12.93                | ± 0.22 | b                    |  | 13.90                | ± 0.80 | ab |
| Kanakis                 | 13.07            | ± 0.15             |    |  | 14.03                 | ± 0.18 |   |  | 13.03                | ± 0.23 |                      |  | 13.37                | ± 0.24 |    |
| Altavista               | 12.63            | ± 0.09             |    |  | 13.00                 | ± 0.12 |   |  | 12.60                | ± 0.15 |                      |  | 12.60                | ± 0.10 |    |
| Nogal                   | 13.63            | ± 0.15             |    |  | 13.73                 | ± 0.26 |   |  | 13.53                | ± 0.43 |                      |  | 13.67                | ± 0.23 |    |
| Monastir                | 13.10            | ± 0.21             |    |  | 13.03                 | ± 0.19 |   |  | 12.63                | ± 0.38 |                      |  | 12.83                | ± 0.42 |    |
| Farah                   | 12.80            | ± 0.06             |    |  | 13.17                 | ± 0.12 |   |  | 12.70                | ± 0.21 |                      |  | 12.67                | ± 0.12 |    |
| Don Matteo              | 13.37            | ± 0.49             |    |  | 14.25                 | ± 0.09 |   |  | 13.63                | ± 0.07 |                      |  | 13.53                | ± 0.07 |    |
| Antalis                 | 13.37            | ± 0.09             | ab |  | 14.20                 | ± 0.21 | a |  | 13.10                | ± 0.25 | b                    |  | 13.17                | ± 0.03 | b  |
| Metropolis              | 13.13            | ± 0.12             |    |  | 13.63                 | ± 0.12 |   |  | 13.20                | ± 0.20 |                      |  | 13.17                | ± 0.23 |    |
| Solehio                 | 12.23            | ± 0.30             |    |  | 12.67                 | ± 0.07 |   |  | 12.37                | ± 0.07 |                      |  | 12.23                | ± 0.20 |    |
| Rebelde                 | 14.23            | ± 0.22             |    |  | 15.27                 | ± 0.12 |   |  | 14.53                | ± 0.20 |                      |  | 14.97                | ± 0.32 |    |
| Total <sup>4</sup>      | 13.19            | ± 0.10             | b  |  | 13.80                 | ± 0.13 | a |  | 13.44                | ± 0.13 | b                    |  | 13.28                | ± 0.15 | b  |
| DW <sup>4</sup>         | 13.33            | ± 0.02             | b  |  | 14.12                 | ± 0.04 | a |  | 13.13                | ± 0.02 | b                    |  | 13.33                | ± 0.03 | b  |
| BW <sup>4</sup>         | 13.02            | ± 0.17             |    |  | 13.43                 | ± 0.20 |   |  | 13.02                | ± 0.19 |                      |  | 13.12                | ± 0.22 |    |

| Protein (%) - 2019/2020 |       |        |          |        |         |        |         |        |         |        |        |   |
|-------------------------|-------|--------|----------|--------|---------|--------|---------|--------|---------|--------|--------|---|
| Varieties               | utc   |        | utc+inoc |        | Fung. A |        | Fung. B |        | Fung. C |        |        |   |
|                         | %     | St_er  | %        | St_er  | %       | St_er  | %       | St_er  | %       | St_er  |        |   |
| Oregrain                | 14.23 | ± 0.17 | 14.47    | ± 0.12 | 14.13   | ± 0.09 | 14.23   | ± 0.03 | 14.20   | ± 0.32 |        |   |
| Lancillotto             | 11.83 | ± 0.07 | 11.73    | ± 0.09 | 11.53   | ± 0.13 | 11.67   | ± 0.07 | 11.50   | ± 0.10 |        |   |
| Marakas                 | 13.53 | ± 0.15 | 13.47    | ± 0.15 | 13.33   | ± 0.03 | 13.47   | ± 0.15 | 13.50   | ± 0.15 |        |   |
| Egeo                    | 14.90 | ± 0.21 | 15.03    | ± 0.28 | 14.77   | ± 0.23 | 14.73   | ± 0.15 | 14.70   | ± 0.10 |        |   |
| Ramirez                 | 12.73 | ± 0.07 | 12.87    | ± 0.03 | 12.73   | ± 0.15 | 12.50   | ± 0.15 | 12.70   | ± 0.15 |        |   |
| Kanakis                 | 14.23 | ± 0.17 | 14.47    | ± 0.12 | 14.23   | ± 0.12 | 14.23   | ± 0.03 | 14.20   | ± 0.32 |        |   |
| Altavista               | 13.00 | ± 0.10 | a        | 13.07  | ± 0.03  | a      | 13.03   | ± 0.03 | a       | 11.33  | ± 0.07 | b |
| Nogal                   | 14.07 | ± 0.07 |          | 14.30  | ± 0.10  |        | 14.03   | ± 0.23 |         | 14.20  | ± 0.06 |   |
| Monastir                | 13.07 | ± 0.09 |          | 13.30  | ± 0.15  |        | 13.10   | ± 0.00 |         | 12.80  | ± 0.00 |   |
| Farah                   | 13.33 | ± 0.07 |          | 13.27  | ± 0.03  |        | 13.37   | ± 0.07 |         | 13.30  | ± 0.06 |   |
| Don Matteo              | 13.80 | ± 0.10 |          | 13.63  | ± 0.13  |        | 13.50   | ± 0.25 |         | 13.30  | ± 0.06 |   |
| Antalis                 | 13.80 | ± 0.10 |          | 13.63  | ± 0.13  |        | 13.50   | ± 0.25 |         | 13.30  | ± 0.06 |   |
| Metropolis              | 13.87 | ± 0.27 |          | 13.87  | ± 0.22  |        | 13.90   | ± 0.21 |         | 13.80  | ± 0.20 |   |
| Solehio                 | 12.13 | ± 0.15 |          | 12.33  | ± 0.13  |        | 12.27   | ± 0.17 |         | 12.10  | ± 0.10 |   |
| Rebelde                 | 14.13 | ± 0.07 |          | 14.20  | ± 0.15  |        | 14.10   | ± 0.20 |         | 14.23  | ± 0.18 |   |
| Total                   | 13.51 | ± 0.13 |          | 13.58  | ± 0.13  |        | 13.44   | ± 0.13 |         | 13.28  | ± 0.15 |   |
| DW                      | 13.68 | ± 0.14 |          | 13.71  | ± 0.14  |        | 13.57   | ± 0.13 |         | 13.45  | ± 0.14 |   |
| BW                      | 13.32 | ± 0.21 |          | 13.42  | ± 0.22  |        | 13.29   | ± 0.22 |         | 13.08  | ± 0.28 |   |

<sup>1</sup>untreated control (utc); untreated-inoculated control (utc+inoc); fungicide combination A (Fung. A); fungicide combination B (Fung. B); fungicide combination C (Fung. C). <sup>2</sup>Average value. <sup>3</sup>Standard Error. <sup>4</sup>Average of all wheat varieties (Total) or durum (DW) and bread (BW) wheat varieties as two separate groups. Averages with different letters are significantly different at P ≤ 0.05 based on the Tukey's HSD adjustment for multiple comparison tests. The absence of letters means the absence of significant differences.
